# Supplementary material
Source: HighWire-hosted journal article supplement (https://bmjopen.bmj.com/content/13/3/e067016)
Supplement: inline-supplementary-material-1 [file inline-supplementary-material-1.pdf]

## GuMIBear Study

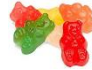

Study ID: GMB: \_\_\_\_\_

^999 – missing data; 0 – no data in medical notes

**CASE RECORD FORM****Stool Sample Collections**

| Period/ Time Frame                  | Projected Date | Sample Date | Sample Collected                                         | Comments |
|-------------------------------------|----------------|-------------|----------------------------------------------------------|----------|
| 1. Within 24h of Birth              |                |             | <input type="checkbox"/> YES <input type="checkbox"/> NO |          |
| 2. Pre-operatively                  |                |             | <input type="checkbox"/> YES <input type="checkbox"/> NO |          |
| 3. Week 1 of life/Post-Op           |                |             | <input type="checkbox"/> YES <input type="checkbox"/> NO |          |
| 4a. Week 4 to 8 life/Post-op        |                |             | <input type="checkbox"/> YES <input type="checkbox"/> NO |          |
| 4b. <b>Urine</b> Sample Week 4 to 8 |                |             | <input type="checkbox"/> YES <input type="checkbox"/> NO |          |
| 5. Week 24 of life/Post-Op          |                |             | <input type="checkbox"/> YES <input type="checkbox"/> NO |          |
| 6. Week 52 of life/Post-Op          |                |             | <input type="checkbox"/> YES <input type="checkbox"/> NO |          |
| 7. Year 2 of life/Post-Op           |                |             | <input type="checkbox"/> YES <input type="checkbox"/> NO |          |

**PATIENT DEMOGRAPHIC**

|                                                                                                                                                                                                                                     |                                                                                                              |                                                                                                       |                                           |                                                                                   |
|-------------------------------------------------------------------------------------------------------------------------------------------------------------------------------------------------------------------------------------|--------------------------------------------------------------------------------------------------------------|-------------------------------------------------------------------------------------------------------|-------------------------------------------|-----------------------------------------------------------------------------------|
| Date of Enrolment:                                                                                                                                                                                                                  |                                                                                                              | Date of Birth:                                                                                        |                                           | Cardiac Classification Group No:                                                  |
| Gender:                                                                                                                                                                                                                             | <input type="checkbox"/> Male<br><input type="checkbox"/> Female<br><input type="checkbox"/> Other/Ambiguous | Gestational Age:<br>APGAR at ① ⑤ min                                                                  | <input type="text"/> <input type="text"/> | Multiple <input type="checkbox"/> Yes <input type="checkbox"/> No<br>Birth Order: |
| Reason for admission:                                                                                                                                                                                                               |                                                                                                              |                                                                                                       |                                           |                                                                                   |
| Comorbidities:                                                                                                                                                                                                                      |                                                                                                              |                                                                                                       |                                           |                                                                                   |
| Mode of Delivery:<br>SVD: <input type="checkbox"/> Yes <input type="checkbox"/> No<br>LSCS: <input type="checkbox"/> Yes <input type="checkbox"/> No, if Yes: <input type="checkbox"/> Elective/ <input type="checkbox"/> Emergency |                                                                                                              | Weight at Birth: _____ . _____ KGs<br>Head Circumference: _____ cms                                   |                                           |                                                                                   |
| Antibiotics to Infant post-delivery; <input type="checkbox"/> Yes <input type="checkbox"/> No<br>If Yes, list:                                                                                                                      |                                                                                                              | Timing of cardiac diagnosis:<br>Postnatal <input type="checkbox"/> Antenatal <input type="checkbox"/> |                                           |                                                                                   |
| Significant Antenatal Events:                                                                                                                                                                                                       |                                                                                                              |                                                                                                       |                                           |                                                                                   |

**MATERNAL INFORMATION**

|                                                                                                   |                                                                                                               |
|---------------------------------------------------------------------------------------------------|---------------------------------------------------------------------------------------------------------------|
| Maternal Age (years) at Birth:                                                                    | Gestational Age at Booking Appt:                                                                              |
| Antibiotics given Pre-Delivery: <input type="checkbox"/> Yes <input type="checkbox"/> No<br>List: | Maternal Probiotics taken during pregnancy:<br><input type="checkbox"/> Yes <input type="checkbox"/> No List: |
| Maternal Smoking during Pregnancy: <input type="checkbox"/> Yes <input type="checkbox"/> No       | Other Household Members Smoking during Pregnancy: <input type="checkbox"/> Yes <input type="checkbox"/> No    |

## GuMIBear Study

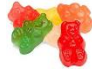

Study ID: GMB: \_\_\_\_\_

^999 – missing data; 0 – no data in medical notes

## SURGERY INFORMATION

|                                         |    |                                          |  |
|-----------------------------------------|----|------------------------------------------|--|
| Surgery Date:                           |    |                                          |  |
| Surgery Performed:                      |    |                                          |  |
| Pre-Op Antibiotics <sup>1</sup> ? List: |    | Post-Op Antibiotics <sup>1</sup> ? List: |  |
| 1. Abs <48hrs pre sampling              |    | 1. Abs <48hrs pre sampling               |  |
| 2. Abx <72hrs pre sampling              |    | 2. Abx <72hrs pre sampling               |  |
| 3. Abx in last 7 days/during sample     |    | 3. Abx in last 7 days/during sample      |  |
| ABG                                     | pH | PO <sup>2</sup>                          |  |
| First Pre-Op ABG:                       |    | Cardiopulmonary Bypass Duration:         |  |
| First Post-Op ABG:                      |    | Aortic Cross Clamp Duration:             |  |
| Significant Intraoperative Events:      |    |                                          |  |

<sup>1</sup>Antibiotic treatment at time of stool sampling as below. Important not to include antibiotics which were started post the stool sampling

- 1) Abs < 48hrs pre sampling
- 2) Abx < 72 hrs pre sampling
- 3) Abx in previous 7 days/ during sample collection

## POST-OPERATIVE INFORMATION

|                  |                                                          |                                           |       |
|------------------|----------------------------------------------------------|-------------------------------------------|-------|
| PIM3 Score:      |                                                          | No. of days in ICU (1 <sup>st</sup> adm): |       |
| Mechanical Vent: | <input type="checkbox"/> Yes <input type="checkbox"/> No | No of Days on ECLS:                       |       |
| No of Days Vent: |                                                          | No of Days on RRT:                        |       |
| Agent            | Day 1                                                    | Day 2                                     | Day 3 |
| Milrinone        |                                                          |                                           |       |
| Epinephrine      |                                                          |                                           |       |
| Norepinephrine   |                                                          |                                           |       |
| Vasopressin      |                                                          |                                           |       |
| Midazolam        |                                                          |                                           |       |
| Morphine         |                                                          |                                           |       |
| Clonidine        |                                                          |                                           |       |
| Others           |                                                          |                                           |       |
| Fluid Balance:   |                                                          |                                           |       |
| BUN:             |                                                          |                                           |       |
| Creatinine:      |                                                          |                                           |       |
| HCT:             |                                                          |                                           |       |
| Hgb:             |                                                          |                                           |       |

## FEEDING INFORMATION

|                                                                                                                                      |                 |        |
|--------------------------------------------------------------------------------------------------------------------------------------|-----------------|--------|
| Mode of Feeding (note <b>date initiated</b> and <b>date d/c</b> ):                                                                   |                 |        |
| Breastmilk:                                                                                                                          | Infant Formula: | Other: |
| Prebiotics given to Infant: <input type="checkbox"/> Yes <input type="checkbox"/> No                                                 |                 |        |
| Type and Date Given:                                                                                                                 |                 |        |
| Excessive Infantile Crying (cried for $\geq 3$ Hrs for 3 Days in one week): <input type="checkbox"/> Yes <input type="checkbox"/> No |                 |        |

**GuMIBear Study**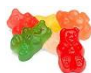

Study ID: GMB: \_\_\_\_\_

^999 – missing data; 0 – no data in medical notes

|                                                                       |                    |
|-----------------------------------------------------------------------|--------------------|
| Date Trophic Feeds Commenced:                                         | Type of Feed Used: |
| Time to Establishment of full feed <sup>2</sup> :                     |                    |
| Development of NEC <sup>3</sup> :<br>Days post-op when developed NEC? |                    |
| Gut stasis:                                                           | Not applicable     |
| Management Strategy:                                                  |                    |

<sup>2</sup>Full feed – No longer requires parenteral nutrition or intravenous fluids supplement regardless the TFI.<sup>3</sup>NEC – Initiation of triple IV antibiotic therapy and nil by mouth for at least 5 days, based on a full surgical review including clinical presentation, radiological and laboratory data.**DISCHARGE INFORMATION**

|                   |       |      |
|-------------------|-------|------|
| Date of Discharge |       |      |
| Ward:             | Home: | RIP: |

**READMISSION TO ICU**

| Total ICU Readmission days: |                   |                   |                 |                      |
|-----------------------------|-------------------|-------------------|-----------------|----------------------|
|                             | Date of Admission | Date of Discharge | Total ICU stays | Reason for admission |
| 1.                          |                   |                   |                 |                      |
| 2.                          |                   |                   |                 |                      |
| 3.                          |                   |                   |                 |                      |
| 4.                          |                   |                   |                 |                      |
| 5.                          |                   |                   |                 |                      |

**DATA ENTRY BY (NAME)**

| Admission | Date | Paper | Date | G-Drive |
|-----------|------|-------|------|---------|
| First     |      |       |      |         |
| Second    |      |       |      |         |
| Third     |      |       |      |         |

|                                                                                             |
|---------------------------------------------------------------------------------------------|
| Participant Withdrawal from Study: <input type="checkbox"/> Yes <input type="checkbox"/> No |
| GCP Procedure Followed: <input type="checkbox"/> Yes <input type="checkbox"/> No            |
| See Study Folder Appendix 4. Signed: _____ Date: _____                                      |
